# Supplementary material for: Prediction of binding property of RNA-binding proteins using multi-sized filters and multi-modal deep convolutional neural network
Source: PubMed Central journal article supplement (PMC6485761; doi:10.1371/journal.pone.0216257), 2019-04-26
Supplement: pone.0216257.s005.pdf [file pone.0216257.s005.pdf]

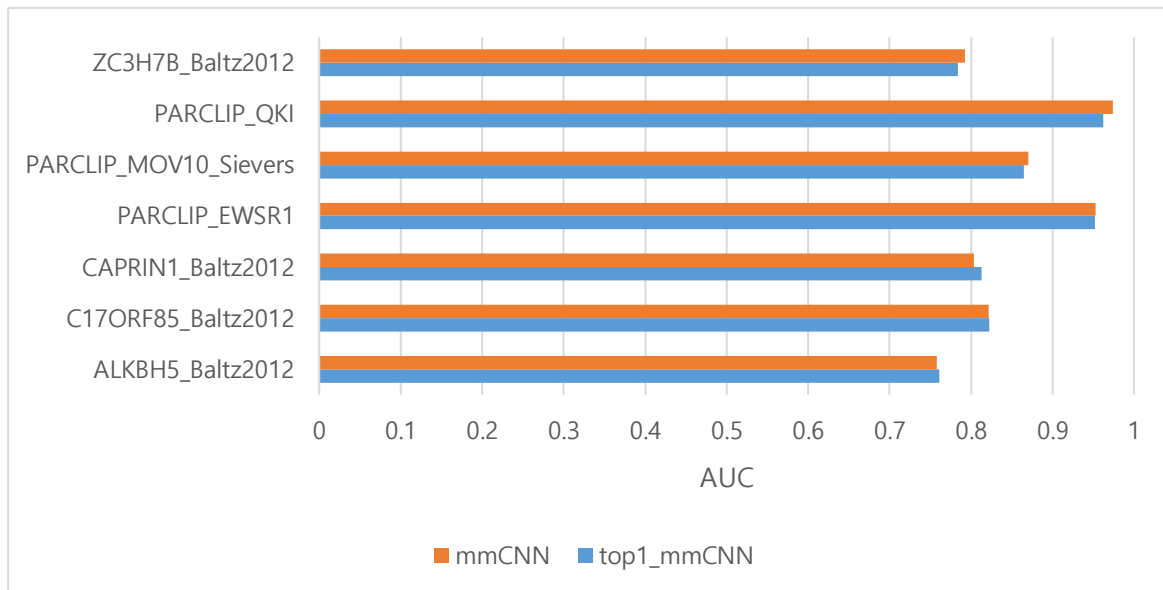

**S5 Fig. AUC comparison between secondary structure forming probability using top 100 secondary structure and single best secondary structure. Structure forming probability using top 100 was better than top 1.**
