# Supplementary material for: Prediction of binding property of RNA-binding proteins using multi-sized filters and multi-modal deep convolutional neural network
Source: PubMed Central journal article supplement (PMC6485761; doi:10.1371/journal.pone.0216257), 2019-04-26
Supplement: pone.0216257.s007.pdf [file pone.0216257.s007.pdf]

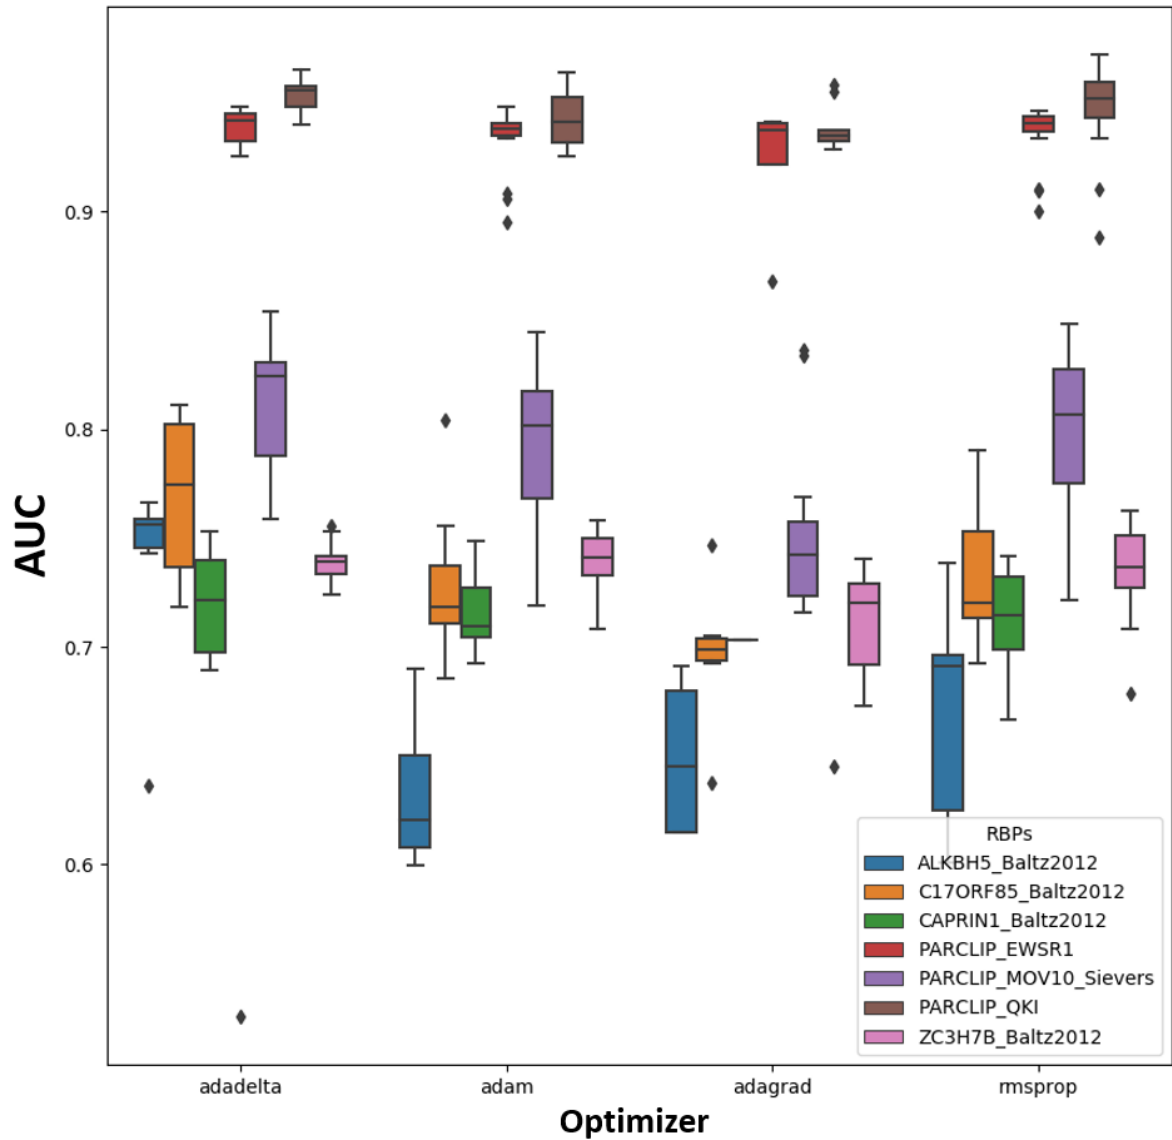

**S7 Fig. mmCNN model optimization using 7 sample RBPs.** For optimizer selection 5 sets of weight initialization range and 5 running rates for Adadelta, Adam, Adagrad, and Rmsprop optimizers.
