# Supplementary material for: Prediction of binding property of RNA-binding proteins using multi-sized filters and multi-modal deep convolutional neural network
Source: PubMed Central journal article supplement (PMC6485761; doi:10.1371/journal.pone.0216257), 2019-04-26
Supplement: pone.0216257.s008.pdf [file pone.0216257.s008.pdf]

| Type of weight | Set1       | Set2       | Set3       | Set4       | Set5       |
|----------------|------------|------------|------------|------------|------------|
| Convolution    | 1e-6, 1e-3 | 1e-5, 1e-3 | 1e-4, 1e-2 | 1e-3, 1e-2 | 1e-3, 1e-2 |
| Dense          | 1e-5, 1e-2 | 1e-4, 1e-2 | 1e-4, 1e-2 | 1e-3, 1e-2 | 1e-2, 1e-1 |

**S1 Table. Five different sets of convolution and dense weight initialization ranges.**
