# Supplementary material for: Prediction of binding property of RNA-binding proteins using multi-sized filters and multi-modal deep convolutional neural network
Source: PubMed Central journal article supplement (PMC6485761; doi:10.1371/journal.pone.0216257), 2019-04-26
Supplement: pone.0216257.s009.pdf [file pone.0216257.s009.pdf]

**S1 Table. Five different learning rates (lr) tested for four optimizers.**

| Optimizer | lr1   | lr2    | lr3    | lr4     | lr5     |
|-----------|-------|--------|--------|---------|---------|
| Adadelta  | 1.0   | 0.5    | 0.1    | 0.05    | 0.01    |
| Adam      | 0.001 | 0.0005 | 0.0001 | 0.00005 | 0.00001 |
| Adagrad   | 0.01  | 0.005  | 0.001  | 0.0005  | 0.0001  |
| Rmsprop   | 0.001 | 0.0005 | 0.0001 | 0.00005 | 0.00001 |

For learning rate, we started our experiment with default value proposed by Keras team, which is lr1 in (Table S2). Additionally, four different learning rate in decreasing order were tested.
